# Supplementary material for: Archived DNA reveals fisheries and climate induced collapse of a major fishery
Source: PubMed Central journal article supplement (PMC4614879; doi:10.1038/srep15395), 2015-10-22
Supplement: srep15395-s1.pdf [file srep15395-s1.pdf]

1 **SUPPLEMENTARY INFORMATION**

2 **Archived DNA reveals fisheries and climate induced collapse of a major fishery**

3 Sara Bonanomi, <sup>1,2,\*†</sup> Loïc Pellissier, <sup>3,†</sup> Nina Overgaard Therkildsen, <sup>2,4</sup> Rasmus Berg Hedeholm, <sup>2,5</sup> Anja  
4 Retzel, <sup>2,5</sup> Dorte Meldrup, <sup>1</sup> Steffen Malskær Olsen, <sup>6</sup> Anders Nielsen, <sup>7</sup> Christophe Pampoulie, <sup>8</sup> Jakob  
5 Hemmer-Hansen, <sup>1</sup> Mary Susanne Wisz, <sup>9,‡</sup> Peter Grønkjær, <sup>2,10,‡</sup> Einar Eg Nielsen <sup>1,2,‡</sup>

6 1 Section for Marine Living Resources, National Institute of Aquatic Resources, Technical University of  
7 Denmark, Vejlsøvej 39, 8600 Silkeborg, Denmark

8 2 Greenland Climate Research Centre, Greenland Institute of Natural Resources, Kivioq 2, PO Box 570,  
9 3900, Nuuk, Greenland

10 3 Department of Biology, Unit of Ecology & Evolution, Chemin du Musée 10, 1700 Fribourg, Switzerland

11 4 Hopkins Marine Station, Department of Biology, Stanford University, 120 Oceanview Blvd, Pacific Grove,  
12 CA 93950, USA

13 5 Greenland Institute of Natural Resources, Kivioq 2, PO Box 570, 3900, Nuuk, Greenland

14 6 Danish Meteorological Institute, Lyngbyvej 100, 2100 Copenhagen, Denmark

15 7 Section for Marine Living Resources, Technical University of Denmark, Jægersborg Allé 1, 2920  
16 Charlottenlund, Denmark

17 8 Marine Research Institute, Reykjavík, Iceland

18 9 Department of Ecology and Environment, DHI, Agern Allé 5, 2960 Hørsholm, Denmark

19 10 Department of Bioscience - Aquatic Biology, Ole Worms Allé 1, 8000 Aarhus, Denmark

20

21 \* Email: sara.bonanomi@an.ismar.cnr.it, Tel: +39 071 2078830

|    |                                                                                                           |
|----|-----------------------------------------------------------------------------------------------------------|
| 22 | <b>Section Overview:</b>                                                                                  |
| 23 | <b>Section S1 – Sampling – Seasonal composition</b>                                                       |
| 24 | <b>Section S2 – Individual assignment tests – Temporal stability</b>                                      |
| 25 | <b>Section S3 – Equilibrium fishing mortalities - Sensitivity analyses</b>                                |
| 26 | <b>Section S4 – Habitat suitability modeling - Hydrodynamical model data</b>                              |
| 27 | <b>Section S4 – Habitat suitability modeling - Evaluating population level suitability with dispersal</b> |
| 28 | <b>Section S5 – Supplementary Figure S1 to S5</b>                                                         |
| 29 | <b>Section S6 – Supplementary Tables S1 to S4</b>                                                         |
| 30 |                                                                                                           |
| 31 |                                                                                                           |
| 32 |                                                                                                           |
| 33 |                                                                                                           |
| 34 |                                                                                                           |
| 35 |                                                                                                           |
| 36 |                                                                                                           |
| 37 |                                                                                                           |
| 38 |                                                                                                           |
| 39 |                                                                                                           |
| 40 |                                                                                                           |
| 41 |                                                                                                           |
| 42 |                                                                                                           |
| 43 |                                                                                                           |
| 44 |                                                                                                           |

45 **Section S1 – Sampling – Seasonal composition**

46 The majority of samples analyzed (85%) were collected during summer months from June to September.  
47 This is consistent across NAFO divisions where "summer" samples constitute a minimum of 69% (mean  
48 89%). Only for two years (1962 and 1980), samples collected in October/November constitute a major part  
49 of the total sampling (58% and 69% respectively). These differences in sampling time could potentially (but  
50 not necessarily) have an effect on population contributions for specific areas for those two years as illustrated  
51 in Figure 2a. However, given the general homogeneity in sampling time across NAFO divisions and years, it  
52 is highly unlikely that these specific differences in sampling time will have any effect on the larger picture  
53 (Figure 2b), with respect to the overall contribution to the fishery by different populations over time.  
54 Furthermore, for a few NAFO divisions/years the number of available samples was low, however, our  
55 conclusions are not based on individual samples but on the overall temporal trends as revealed by the  
56 probability distribution of total catch composition over time and the suitability modeling.

57

58 **Section S2 – Individual assignment tests – Temporal stability**

59 With both assignment approaches, the baseline genetic signature (allele frequencies) of each spawning  
60 population was defined based on individual samples collected at the spawning time for a previous study <sup>1</sup>.  
61 For three of the four populations, the reference dataset included samples of 25-59 individuals collected four-  
62 six decades apart. There was consistently less genetic differentiation between samples collected over time  
63 within the same reference location ( $F_{st} < 0.029$ ) than there was between the reference populations ( $F_{st} \geq$   
64  $0.044$ ). Assignment tests using only the contemporary samples as the reference also assigned 81-98% of the  
65 historical reference individuals to their correct population, indicating a high level of temporal stability in the  
66 genetic signatures for each population over the study period.

67

68 **Section S3 – Equilibrium fishing mortalities - Sensitivity analyses**

69 We performed a sensitivity analysis to examine the robustness of the equilibrium fishing mortality to  
70 changes in weight-at-age and maturity-at-age in the West Greenlandic offshore cod population, by increasing  
71 the weight and the proportion of mature fish at each age stepwise by 10% to 50% above the starting values  
72 and calculating the resulting Feq as above. The change in weight-at-age had the largest impact on Feq, but in  
73 none of the scenarios did Feq increase beyond the F observed during the collapse of the West Greenlandic  
74 offshore cod population (Supplementary Figure S3). Hence, increased growth and earlier maturity could not  
75 counter-balance the increasing fishing pressure during the 1950s and 1960s.

76 Because the equilibrium fishing mortalities were calculated from the spawning biomass and recruitment  
77 time-series, these numbers were influenced by errors in the estimation of these two quantities. We therefore  
78 ran matrix-of-error scenarios to evaluate the potential impact of errors on Feq. Using the average West-  
79 Greenlandic spawning stock biomass and recruitment from 1955-1972 <sup>2</sup>, we estimated the Feq resulting from  
80 a matrix ranging from a ratio of 0.2 to 1.6 between true and estimated spawning stock biomass, and 0.4 – 2  
81 between true and estimated recruitment (see Supplementary Figure S4). A ratio of 0.2 corresponds to a factor  
82 five overestimation, whereas a ration of two corresponds to a factor two underestimation of either spawning  
83 stock biomass or recruitment. This range of scenarios also covers the situation during the period of collapse  
84 of the West-Greenlandic population (1950-1968) where the proportion of West-Greenlandic cod contributed  
85 on average 38% percent of the total biomass. It's important to note, however, that the proportion of West-  
86 Greenlandic cod in the spawning stock biomass is likely to be an underestimate, as the Icelandic Offshore  
87 fish migrate back to East Greenland and Iceland at maturation. Only at extreme overestimations of spawning  
88 stock biomass (0.25 or factor 4) and underestimation of recruitment (half of true recruitment) did the West-  
89 Greenlandic Feq approach the Icelandic Feq (0.84). According to previous work <sup>3</sup>, the fishing mortality rose  
90 above 0.5 around 1960. In order to sustain this fishing pressure, the spawning stock biomass per recruit  
91 should have been as little as 1.5 kg, which at the same recruitment level would have required that the true  
92 spawning stock was overestimated by a factor of more than 3. Consequently there is nothing in this  
93 sensitivity analyses that suggests that the West-Greenland population was able to sustain the same fishing

94 pressure as the Icelandic offshore population or even sustain the fishing pressure that developed during  
95 1950s to the collapse of the West-Greenland population around 1970.

96 We also characterized the relationship between equilibrium F(5-12) and West Greenlandic offshore cod  
97 population productivity, i.e. the spawning stock biomass needed to produce one recruit (SBB/R)  
98 (Supplementary Figure S5).

99

#### 100 **Section S4 – Oceanographic model data**

101 In order to describe recent historical ocean conditions we draw upon an archived ocean hindcast simulation  
102 conducted using the EC-Earth climate model configured in a decoupled, forced mode. The applied version  
103 (V2.2) of EC-Earth<sup>4</sup> is a fully coupled Atmosphere Ocean General Circulation Model (AOGCM), which  
104 builds on the Nucleus for European Modeling of the Ocean, NEMO system coupled to the LIM2 sea-ice  
105 module. The ocean configuration of NEMO has a resolution of  $1^\circ \times 1^\circ$  with a meridional refinement to  $1/3^\circ$  at  
106 the equator, referred to as the ORCA1 grid. Here, the singularity at the North Pole is avoided by use of a tri-  
107 polar grid with poles over land (Siberia, Canada, Antarctica). Using 42 vertical z-layers, vertical ocean  
108 resolution increases from 10m at the surface to 300m at depth and reaches down to 5,500m. The large scale  
109 ocean circulation in the coupled system is in good agreement with the present views (see<sup>5</sup> and references  
110 herein) and general characteristics of the Arctic - subarctic ice-ocean exchange system has been convincingly  
111 assessed in<sup>6</sup>. The uncoupled simulation for the period 1948-2011 is forced by 6-hourly atmospheric NCEP  
112 reanalysis data<sup>7</sup>. Runoff is prescribed from climatology and we make use of sea surface salinity restoring  
113 (app. 180 days for a 10m mixed layer). Using an annually permuted NCEP forcing sequence<sup>8</sup>, an  
114 independent 300 years spin-up has been performed and the quasi equilibrium climate state of the ocean  
115 simulations has shown a modest drift in water mass properties relative to climatology. We computed the  
116 mean, maximum and minimum annual sea surface temperatures, bottom temperatures and barotropic stream  
117 function to map dynamically connected regions at the model grid and interpolate to a 7x7 km resolution to  
118 refine the coastline. Furthermore, we extracted climatic information for each year and location of each fish

119 recorded and we performed the ordination to visualize climatic niche differences between the two main  
120 spawning groups: West Greenland offshore and Iceland offshore (see Supplementary Figure S2).

121

#### 122 **Section S4 – Habitat suitability modeling - Evaluating population level suitability with dispersal**

123 We computed the genetic proportion of the Iceland offshore population relative to the West Greenland  
124 offshore in each NAFO divisions (1A - 1F) for each time period. For each division and each time period, we  
125 computed the least-cost distance from the center of each division to the southern tip of Greenland,  
126 accounting for climatic suitability either at the species level or specific to the Iceland offshore population  
127 using the `gdistance` package in R. We computed this distance from the southern tip of Greenland, because  
128 this area corresponds to the entry point of the Iceland offshore population into west Greenland waters (Figure  
129 3b). We also computed a static sea distance from this point to each NAFO division. Northwest Atlantic  
130 Fisheries Organization (NAFO) members send their annual compilation of information on national catches  
131 and landings to the NAFO secretariat, and NAFO fisheries statistics have been compiled since 1951<sup>9</sup>. The  
132 database contains information on annual catches by species, subareas, country and year. We computed the  
133 average landing of cod in each division during the five years prior to the date with genetic sampling. We then  
134 related the proportion of Iceland offshore population in each NAFO division to distance between the center  
135 of the NAFO division to the southern tip of Greenland according to three distance metrics a) geographic  
136 distance “as the fish swims”, b) a least cost path through a habitat suitability surface defined for cod (all  
137 spawning populations combined), and c) a least cost path derived through a habitat suitability surface derived  
138 for each spawning population. We compared the explained variance of each predictor ( $R^2$ ) and tested the  
139 significance using a Wald-z test.

140 Moreover, to visualize climatic niche differences between the two spawning groups, we performed a  
141 Principal Component Analysis (PCA) on the mixed-stock data. We extracted climatic information for each  
142 year and location of each otolith recorded and we performed the ordination to contrast the West Greenland  
143 offshore and Iceland offshore population niches. Results showed that the West Greenland offshore

144 population occurred predominantly in colder sea surface temperatures, while the Iceland offshore population  
145 occupied a relatively broader range of temperature conditions including warmer temperatures.

146

147

148

149

150

151

152

153

154

155

156

157

158

159

160

161

162

163

164

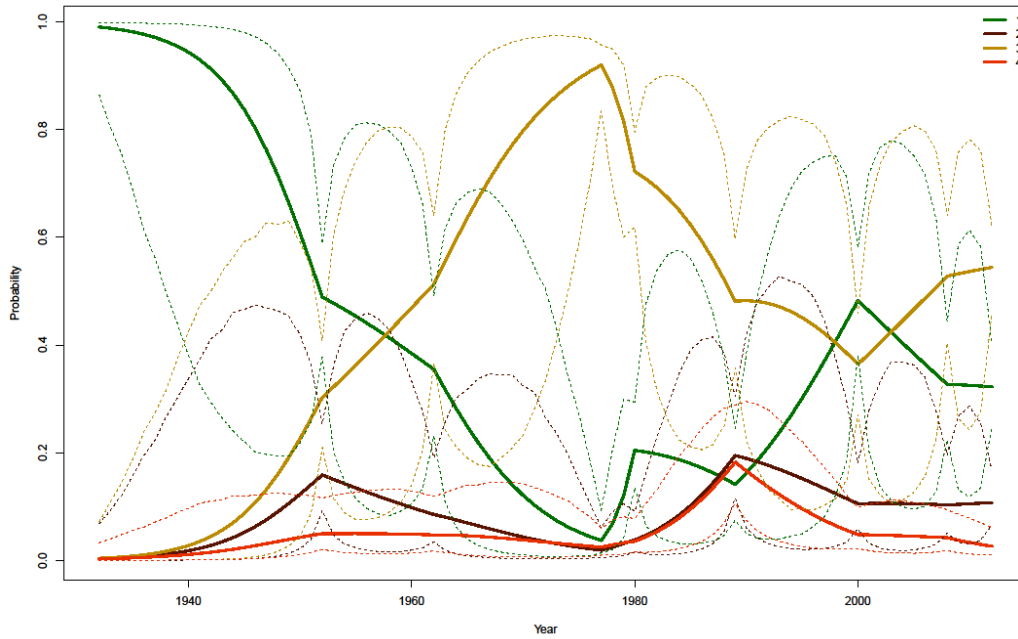

166  
167

168 **Supplementary Figure S1.** Probability distributions and their 95% confidence intervals (dotted lines) for  
169 contribution of the four populations to the total catch across the studied time period. Each color represents  
170 one of the four spawning populations of cod: West Greenland offshore (green, 1), West Greenland inshore  
171 (brown, 2), Iceland offshore (dark yellow, 3) and Iceland inshore (red, 4).

172  
173  
174  
175  
176  
177  
178  
179  
180



181  
182  
183  
184  
185  
186  
187  
188  
189

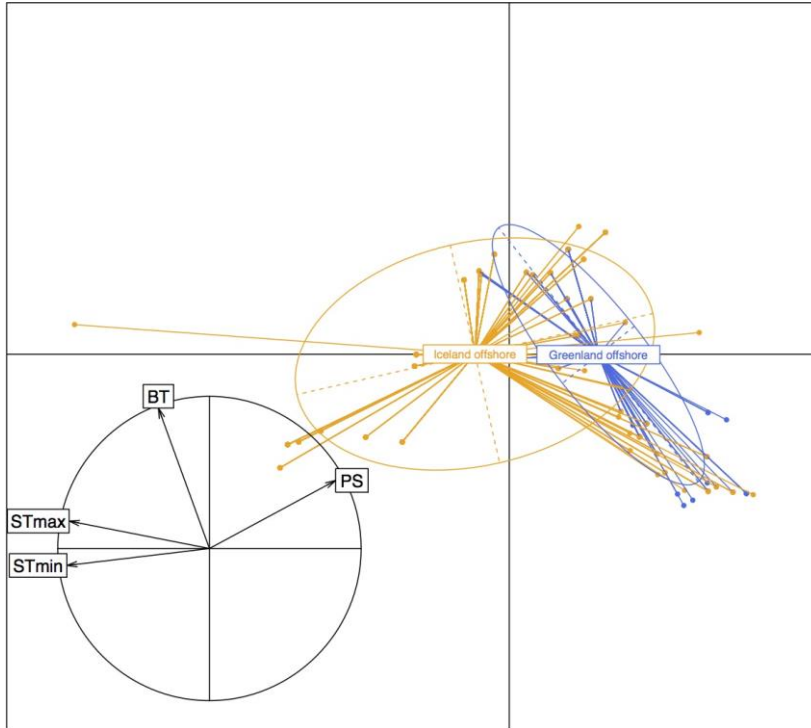

190

191 **Supplementary Figure S2.** Plot of a principal component analysis (PCA) on climatic information from  
192 coupling the fish occurrences and the Atmosphere Ocean Circulation Model (AOGCM) environmental layers  
193 (max and min sea surface temperature, STmax and STmin; bottom temperature, BT; barotropic stream  
194 function, PS). Component 1 is plotted on the X axis, while component 2 is on the Y axis. The West  
195 Greenland offshore (blue) and Iceland offshore (in orange) spawning populations are shown.

196

197

198

199

200

201

202

203

204

### Equilibrium $F_{(5-12)}$

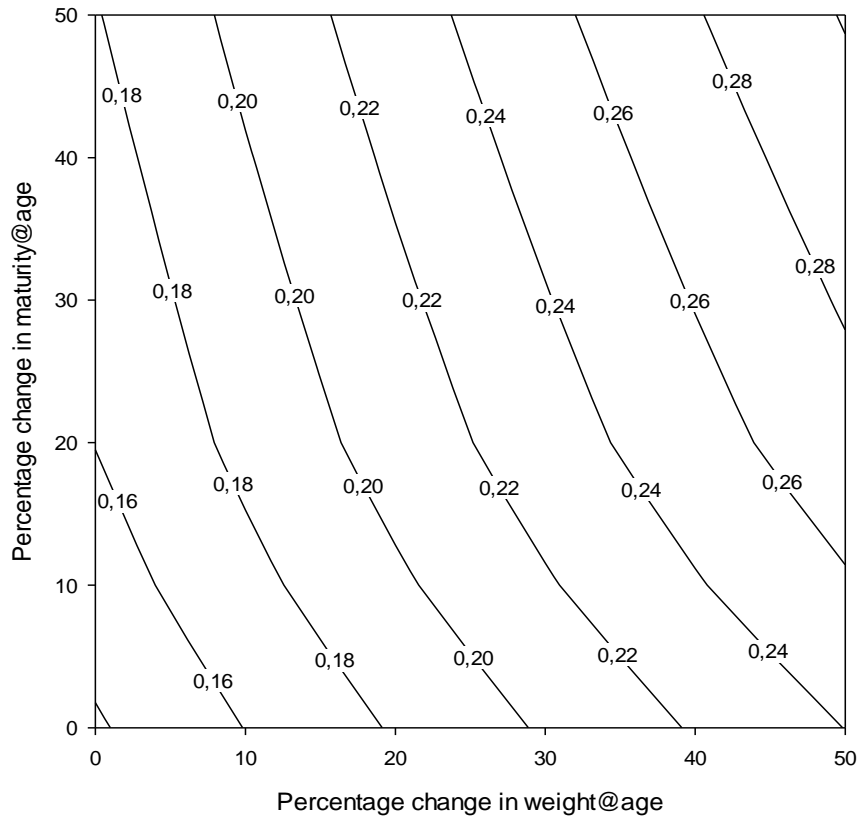

205

206

207 **Supplementary Figure S3.** Sensitivity analysis of the effect of increasing weight and maturity-at-age on the  
208 equilibrium fishing mortality.

209

210

211

### Equilibrium $F_{(5-12)}$

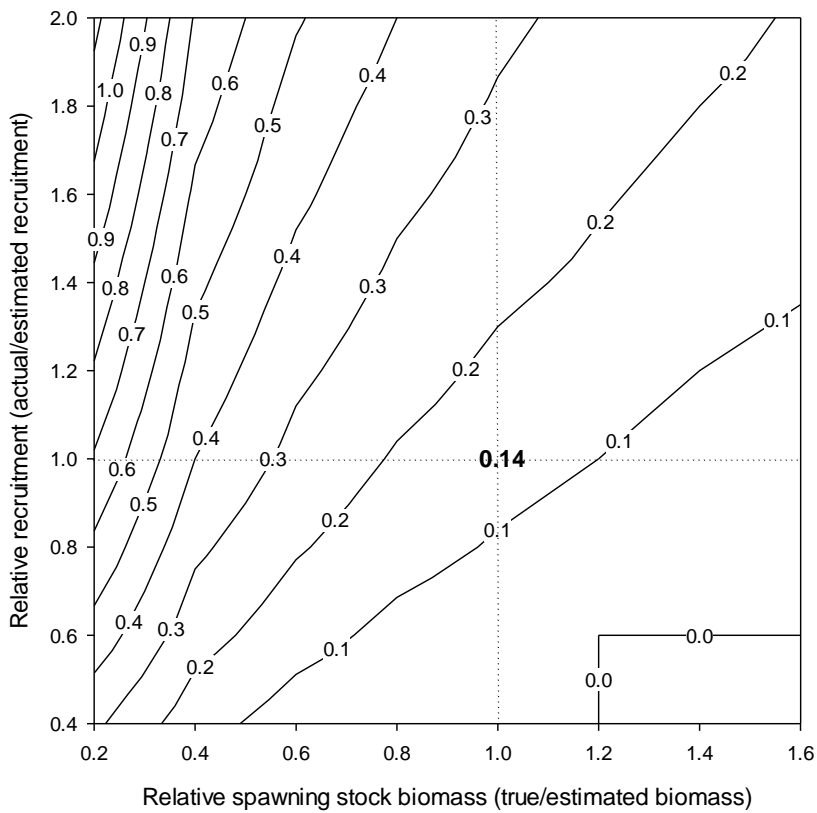

212

213

214 **Supplementary Figure S4.** Sensitivity analysis of the effect of errors in the spawning stock biomass (SSB)  
215 and recruitment estimation on equilibrium fishing mortality. A relative spawning stock biomass of 1.6 means  
216 that the true SSB was 60% larger than originally estimated. A relative recruitment of 2.0 means that  
217 recruitment is double what was originally estimated.

218

219

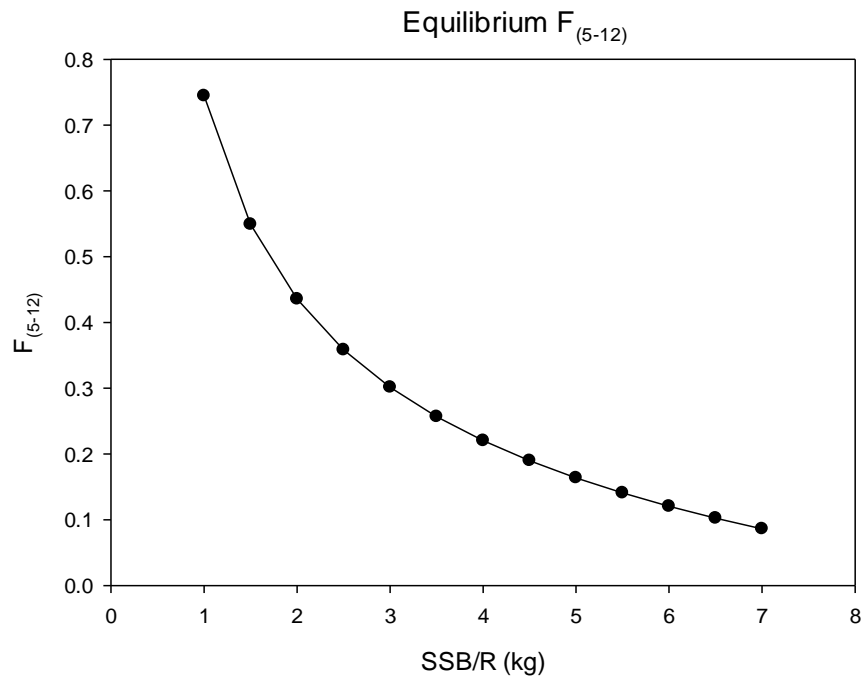

220

221

222 **Supplementary Figure S5.** The relationship between spawning stock productivity (biomass needed to  
223 produce one recruit) and equilibrium fishing mortality in the West Greenlandic offshore cod population.

224

225

226

227

228

229

230

231

232 **Section S6 – Supplementary Tables S1 to S4**

233 **Supplementary Table S1.** Archived tissue samples of Atlantic cod (*Gadus morhua*) collected between late  
234 June and January in 1932, 1952, 1962, 1977, 1980, 1989, 2000, 2008 and 2012 across the NAFO divisions in  
235 West Greenland.

| Year | NAFO division |    |    |    |    |    |
|------|---------------|----|----|----|----|----|
|      | 1A            | 1B | 1C | 1D | 1E | 1F |
| 1932 |               | 26 | 33 | 31 |    |    |
| 1952 |               | 10 | 21 | 22 | 17 | 20 |
| 1962 |               | 12 | 10 | 23 | 3  | 11 |
| 1977 |               |    |    | 36 | 28 | 37 |
| 1980 |               | 30 |    | 39 | 30 |    |
| 1989 |               |    |    | 31 | 16 | 36 |
| 2000 | 6             | 42 | 30 | 26 |    | 8  |
| 2008 |               | 26 |    | 13 | 11 | 27 |
| 2012 | 18            | 35 | 26 | 29 | 25 | 28 |

236

237

238

239

240

241

242

243

244

245 **Supplementary Table S2.** Archived tissue samples of Atlantic cod (*Gadus morhua*) collected between late  
 246 June and January in 1932, 1952, 1962, 1977, 1980, 1989, 2000, 2008 and 2012 across the NAFO divisions in  
 247 West Greenland.

| 1A        | Sampling years |      |      |      |      |      |      |      |      |
|-----------|----------------|------|------|------|------|------|------|------|------|
|           | 1932           | 1952 | 1962 | 1977 | 1980 | 1989 | 2000 | 2008 | 2012 |
| June      |                |      |      |      |      |      |      |      | 16   |
| July      |                |      |      |      |      |      |      |      |      |
| August    |                |      |      |      |      |      | 7    |      |      |
| September |                |      |      |      |      |      |      |      |      |
| October   |                |      |      |      |      |      |      |      |      |
| November  |                |      |      |      |      |      |      |      |      |
| December  |                |      |      |      |      |      |      |      |      |
| January   |                |      |      |      |      |      |      |      |      |
| 1B        | Sampling years |      |      |      |      |      |      |      |      |
|           | 1932           | 1952 | 1962 | 1977 | 1980 | 1989 | 2000 | 2008 | 2012 |
| June      |                |      |      |      |      |      |      | 10   | 25   |
| July      |                |      |      |      |      |      | 37   | 13   |      |
| August    | 24             | 3    | 2    |      |      |      |      |      |      |
| September |                | 3    | 1    |      |      |      |      |      |      |

|                  |                       |             |             |             |             |             |             |             |             |
|------------------|-----------------------|-------------|-------------|-------------|-------------|-------------|-------------|-------------|-------------|
| <b>October</b>   |                       | 2           | 1           |             |             |             |             |             |             |
| <b>November</b>  |                       | 1           | 2           |             |             | 26          |             |             |             |
| <b>December</b>  |                       |             | 1           |             |             |             |             |             |             |
| <b>January</b>   |                       | 1           | 1           |             |             |             |             |             |             |
| <b>1C</b>        | <b>Sampling years</b> |             |             |             |             |             |             |             |             |
|                  | <b>1932</b>           | <b>1952</b> | <b>1962</b> | <b>1977</b> | <b>1980</b> | <b>1989</b> | <b>2000</b> | <b>2008</b> | <b>2012</b> |
| <b>June</b>      |                       |             | 2           |             |             |             |             |             | 1           |
| <b>July</b>      | 20                    | 15          | 2           |             |             |             | 28          |             | 21          |
| <b>August</b>    | 13                    |             | 1           |             |             |             |             |             |             |
| <b>September</b> |                       | 1           | 1           |             |             |             |             |             |             |
| <b>October</b>   |                       | 1           | 1           |             |             |             |             |             |             |
| <b>November</b>  |                       |             | 1           |             |             |             |             |             |             |
| <b>December</b>  |                       |             |             |             |             |             |             |             |             |
| <b>January</b>   |                       |             | 1           |             |             |             |             |             |             |
| <b>1D</b>        | <b>Sampling years</b> |             |             |             |             |             |             |             |             |
|                  | <b>1932</b>           | <b>1952</b> | <b>1962</b> | <b>1977</b> | <b>1980</b> | <b>1989</b> | <b>2000</b> | <b>2008</b> | <b>2012</b> |
| <b>June</b>      |                       | 4           | 2           |             |             |             |             |             | 8           |
| <b>July</b>      |                       | 8           |             |             |             | 6           | 22          | 8           | 19          |

|                  |                       |             |             |             |             |             |             |             |             |
|------------------|-----------------------|-------------|-------------|-------------|-------------|-------------|-------------|-------------|-------------|
| <b>August</b>    | 25                    | 5           | 1           |             |             | 21          |             |             |             |
| <b>September</b> |                       | 2           | 3           | 17          |             |             |             |             |             |
| <b>October</b>   |                       | 1           | 9           | 17          | 39          |             |             |             |             |
| <b>November</b>  |                       |             | 1           |             |             |             |             |             |             |
| <b>December</b>  |                       |             |             |             |             |             |             |             |             |
| <b>January</b>   |                       |             | 1           |             |             |             |             |             |             |
| <b>1E</b>        | <b>Sampling years</b> |             |             |             |             |             |             |             |             |
|                  | <b>1932</b>           | <b>1952</b> | <b>1962</b> | <b>1977</b> | <b>1980</b> | <b>1989</b> | <b>2000</b> | <b>2008</b> | <b>2012</b> |
| <b>June</b>      |                       |             | 3           | 27          | 29          |             |             |             |             |
| <b>July</b>      |                       | 16          |             |             |             |             |             |             | 22          |
| <b>August</b>    |                       | 1           |             |             | 13          |             |             | 10          |             |
| <b>September</b> |                       |             |             |             |             |             |             |             |             |
| <b>October</b>   |                       |             |             |             |             |             |             |             |             |
| <b>November</b>  |                       |             |             |             |             |             |             |             |             |
| <b>December</b>  |                       |             |             |             |             |             |             |             |             |
| <b>January</b>   |                       |             |             |             |             |             |             |             |             |
| <b>1F</b>        | <b>Sampling years</b> |             |             |             |             |             |             |             |             |
|                  | <b>1932</b>           | <b>1952</b> | <b>1962</b> | <b>1977</b> | <b>1980</b> | <b>1989</b> | <b>2000</b> | <b>2008</b> | <b>2012</b> |



---

|                  |    |   |    |    |    |
|------------------|----|---|----|----|----|
| <b>June</b>      |    |   |    |    |    |
| <b>July</b>      |    | 1 |    |    | 24 |
| <b>August</b>    |    |   | 34 | 28 | 22 |
| <b>September</b> | 19 |   |    | 8  |    |
| <b>October</b>   | 1  |   |    |    |    |
| <b>November</b>  |    |   |    |    |    |
| <b>December</b>  |    | 6 |    |    |    |
| <b>January</b>   |    | 1 |    |    |    |

---

248

249

250

251

252

253

254

255

256

257

258

259 **Supplementary Table S3.** SSB per recruit analysis based on input data from the West Greenland offshore cod  
 260 population. Natural mortality is 0.2 and the VPA fishing mortalities are the average values from 1961-1963.

| Age<br>(yr) | F<br>from VPA   | Equilibrium<br>F | Z    | Weight<br>(kg) | Maturity<br>ogive | Stock<br>(n) | Catch<br>(n) | Yield<br>(kg) | SSB<br>(kg) |
|-------------|-----------------|------------------|------|----------------|-------------------|--------------|--------------|---------------|-------------|
| 3           | 0.02            | 0.01             | 0.21 | 0.58           | 0.01              | 1.00         | 0.01         | 0.00          | 0.01        |
| 4           | 0.10            | 0.03             | 0.23 | 1.28           | 0.03              | 0.81         | 0.02         | 0.03          | 0.03        |
| 5           | 0.27            | 0.08             | 0.28 | 1.72           | 0.11              | 0.65         | 0.04         | 0.08          | 0.12        |
| 6           | 0.38            | 0.11             | 0.31 | 2.51           | 0.32              | 0.49         | 0.05         | 0.12          | 0.39        |
| 7           | 0.56            | 0.16             | 0.36 | 3.52           | 0.61              | 0.36         | 0.05         | 0.17          | 0.77        |
| 8           | 0.55            | 0.16             | 0.36 | 4.66           | 0.83              | 0.25         | 0.03         | 0.15          | 0.97        |
| 9           | 0.48            | 0.14             | 0.34 | 5.07           | 0.94              | 0.18         | 0.02         | 0.10          | 0.84        |
| 10          | 0.48            | 0.14             | 0.34 | 5.68           | 0.98              | 0.13         | 0.01         | 0.08          | 0.70        |
| 11          | 0.52            | 0.15             | 0.35 | 5.37           | 0.99              | 0.09         | 0.01         | 0.06          | 0.48        |
| 12          | 0.62            | 0.18             | 0.38 | 8.65           | 1.00              | 0.06         | 0.01         | 0.08          | 0.55        |
| 13          | 0.60            | 0.17             | 0.37 | 9.58           | 1.00              | 0.04         | 0.01         | 0.06          | 0.42        |
| 14          | 0.48            | 0.14             | 0.34 | 9.60           | 1.00              | 0.03         | 0.00         | 0.03          | 0.29        |
|             | <i>F(5-12):</i> | <i>0.14</i>      |      |                |                   |              | <i>Sum:</i>  | <i>0.97</i>   | <i>5.57</i> |

261

262

263

264

265

266

267

268

269 **Supplementary Table S4.** SSB per recruit analysis based on input data from the Icelandic offshore cod  
 270 population. Natural mortality is 0.2 and the VPA fishing mortalities are the average values from 1961-1963.  
 271 All other input data are averages from 1955-2005.

| Age<br>(yr) | F<br>from VPA   | Equilibrium<br>F | Z    | Weight<br>(kg) | Maturity<br>ogive | Stock<br>(n) | Catch<br>(n) | Yield<br>(kg) | SSB<br>(kg) |
|-------------|-----------------|------------------|------|----------------|-------------------|--------------|--------------|---------------|-------------|
| 3           | 0.07            | 0.09             | 0.29 | 0.64           | 0.01              | 1.00         | 0.15         | 0.10          | 0.01        |
| 4           | 0.23            | 0.29             | 0.49 | 1.37           | 0.04              | 0.75         | 0.21         | 0.29          | 0.04        |
| 5           | 0.37            | 0.48             | 0.68 | 2.19           | 0.13              | 0.46         | 0.13         | 0.28          | 0.11        |
| 6           | 0.49            | 0.63             | 0.63 | 3.25           | 0.36              | 0.23         | 0.06         | 0.20          | 0.22        |
| 7           | 0.60            | 0.77             | 0.97 | 4.41           | 0.65              | 0.10         | 0.04         | 0.17          | 0.27        |
| 8           | 0.70            | 0.90             | 1.10 | 6.18           | 0.79              | 0.04         | 0.02         | 0.13          | 0.21        |
| 9           | 0.74            | 0.95             | 1.15 | 7.30           | 0.81              | 0.01         | 0.01         | 0.06          | 0.10        |
| 10          | 0.76            | 0.98             | 1.18 | 8.51           | 0.98              | 0.00         | 0.00         | 0.03          | 0.05        |
| 11          | 0.74            | 0.96             | 1.16 | 9.81           | 1.00              | 0.00         | 0.00         | 0.01          | 0.02        |
| 12          | 0.67            | 0.87             | 1.07 | 11.57          | 0.99              | 0.00         | 0.00         | 0.00          | 0.01        |
| 13          | 0.53            | 0.68             | 0.88 | 13.17          | 1.00              | 0.00         | 0.00         | 0.00          | 0.00        |
| 14          | 0.53            | 0.68             | 0.88 | 15.98          | 1.00              | 0.00         | 0.00         | 0.00          | 0.00        |
|             | <i>F(5-12):</i> | <i>0.82</i>      |      |                |                   |              | <i>Sum:</i>  | <i>1.39</i>   | <i>1.06</i> |

272

273

274

275

276

277

278

279

280

281

282

283

284 **References**

- 285 1. Therkildsen, N.O. *et al.* Spatiotemporal SNP analysis reveals pronounced biocomplexity at the northern  
286 range margin of Atlantic cod *Gadus morhua*. *Evolutionary Applications* **6**, 690–705 (2013).
- 287 2. ICES. *Report of the North-Western Working Group (NWWG), 1 – 8 May 1996*. ICES ICES Document  
288 CM 1996/Assess: 15. *Scientific report* (1996).
- 289 3. Hovgård, H. & Wieland, K. Fishery and environmental aspects relevant for the emergence and decline of  
290 Atlantic cod (*Gadus morhua*) in West Greenland waters. Resiliency of gadid stocks to fishing and  
291 climate change. Alaska Sea Grant, University of Alaska Fairbanks (2008).
- 292 4. Hazeleger, W. *et al.* EC-Earth V2. 2: description and validation of a new seamless earth system  
293 prediction model. *Climate dynamics* **39**, 2611-2629 (2012).
- 294 5. Sterl, A. *et al.* A look at the ocean in the EC-Earth climate model. *Climate dynamics* **39**, 2631-2657  
295 (2012).
- 296 6. Koenigk, T. *et al.* Arctic climate change in 21st century CMIP5 simulations with EC-Earth. *Climate*  
297 *dynamics*, 40(11-12), 2719-2743 (2013).
- 298 7. Kalnay, E. *et al.* The NCEP/NCAR 40-year reanalysis project. *Bulletin of the American meteorological*  
299 *Society* **77**, 437-471 (1996).
- 300 8. Olsen, S.M. & Schmith, T. North Atlantic–Arctic Mediterranean exchanges in an ensemble hindcast  
301 experiment. *Journal of Geophysical Research: Oceans (1978–2012)* **112**, (2007).
- 302 9. WEBSITE: <http://www.nafo.int/data/rames/data.html>
